# Supplementary material
Source: MDPI journal article supplement (https://www.mdpi.com/2073-4395/12/10/2288)
Supplement: s1 [file s1]

**Table S1.** Effects of tillage, depth and their interaction on soil physicochemical property, root length density and bacterial alpha diversity index.

| Item               | Tillage | Depth | Interaction |
|--------------------|---------|-------|-------------|
| TN                 | **      | ns    | ns          |
| NH <sub>4</sub> -N | ***     | ***   | ***         |
| NO <sub>3</sub> -N | ***     | ***   | ***         |
| TOC                | ***     | *     | ***         |
| VWC                | ***     | ***   | ***         |
| pH                 | ***     | ***   | ns          |
| C/N                | ns      | ns    | ns          |
| SC                 | ***     | ***   | ***         |
| RLD                | ***     | ***   | ns          |
| Chao1              | ***     | ***   | ***         |
| Shannon            | **      | ***   | **          |
| Simpson            | **      | ***   | ns          |

Tillage method: rotary tillage (RT), subsoiling-rotary tillage (ST); depth level: 0~10 cm, 10~20 cm. Root length density (RLD) means RLD selected from flowering period. \* $P < 0.05$ , \*\* $P < 0.01$ , \*\*\* $P < 0.001$ , ns: not significant difference.
